# Supplementary material for: Independent vector analysis using subband and subspace nonlinearity
Source: Springer Nature journal article supplement (doi:10.1186/1687-6180-2013-74), 2013-04-10
Supplement: 13634_2012_467_MOESM3_ESM.pdf [file 13634_2012_467_MOESM3_ESM.pdf]

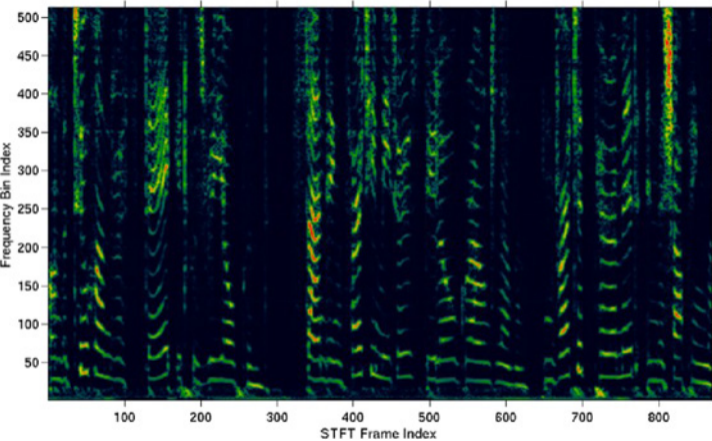

(a) spectrogram

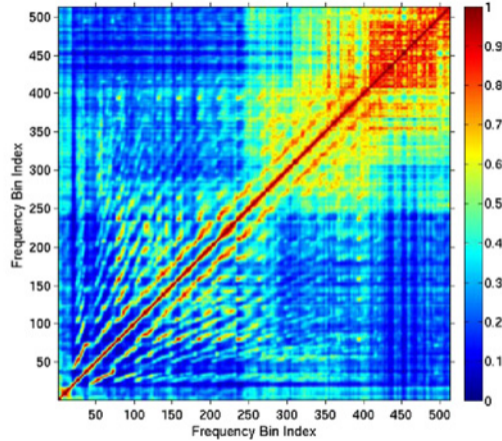

(b) corresponding correlation matrix
