# Supplementary material for: Independent vector analysis using subband and subspace nonlinearity
Source: Springer Nature journal article supplement (doi:10.1186/1687-6180-2013-74), 2013-04-10
Supplement: 13634_2012_467_MOESM11_ESM.pdf [file 13634_2012_467_MOESM11_ESM.pdf]

**(a)** speech signal from [32]

**(b)** destroyer engine noise from [39]
